# Supplementary material for: Design, synthesis, and biological activity studies of carbonic anhydrase inhibitors
Source: publisher site journal article supplement (doi:10.1515/znc-2023-0102), 2023-11-01
Supplement: Supplementary file 1 [file j_znc-2023-0102_suppl_001.docx]

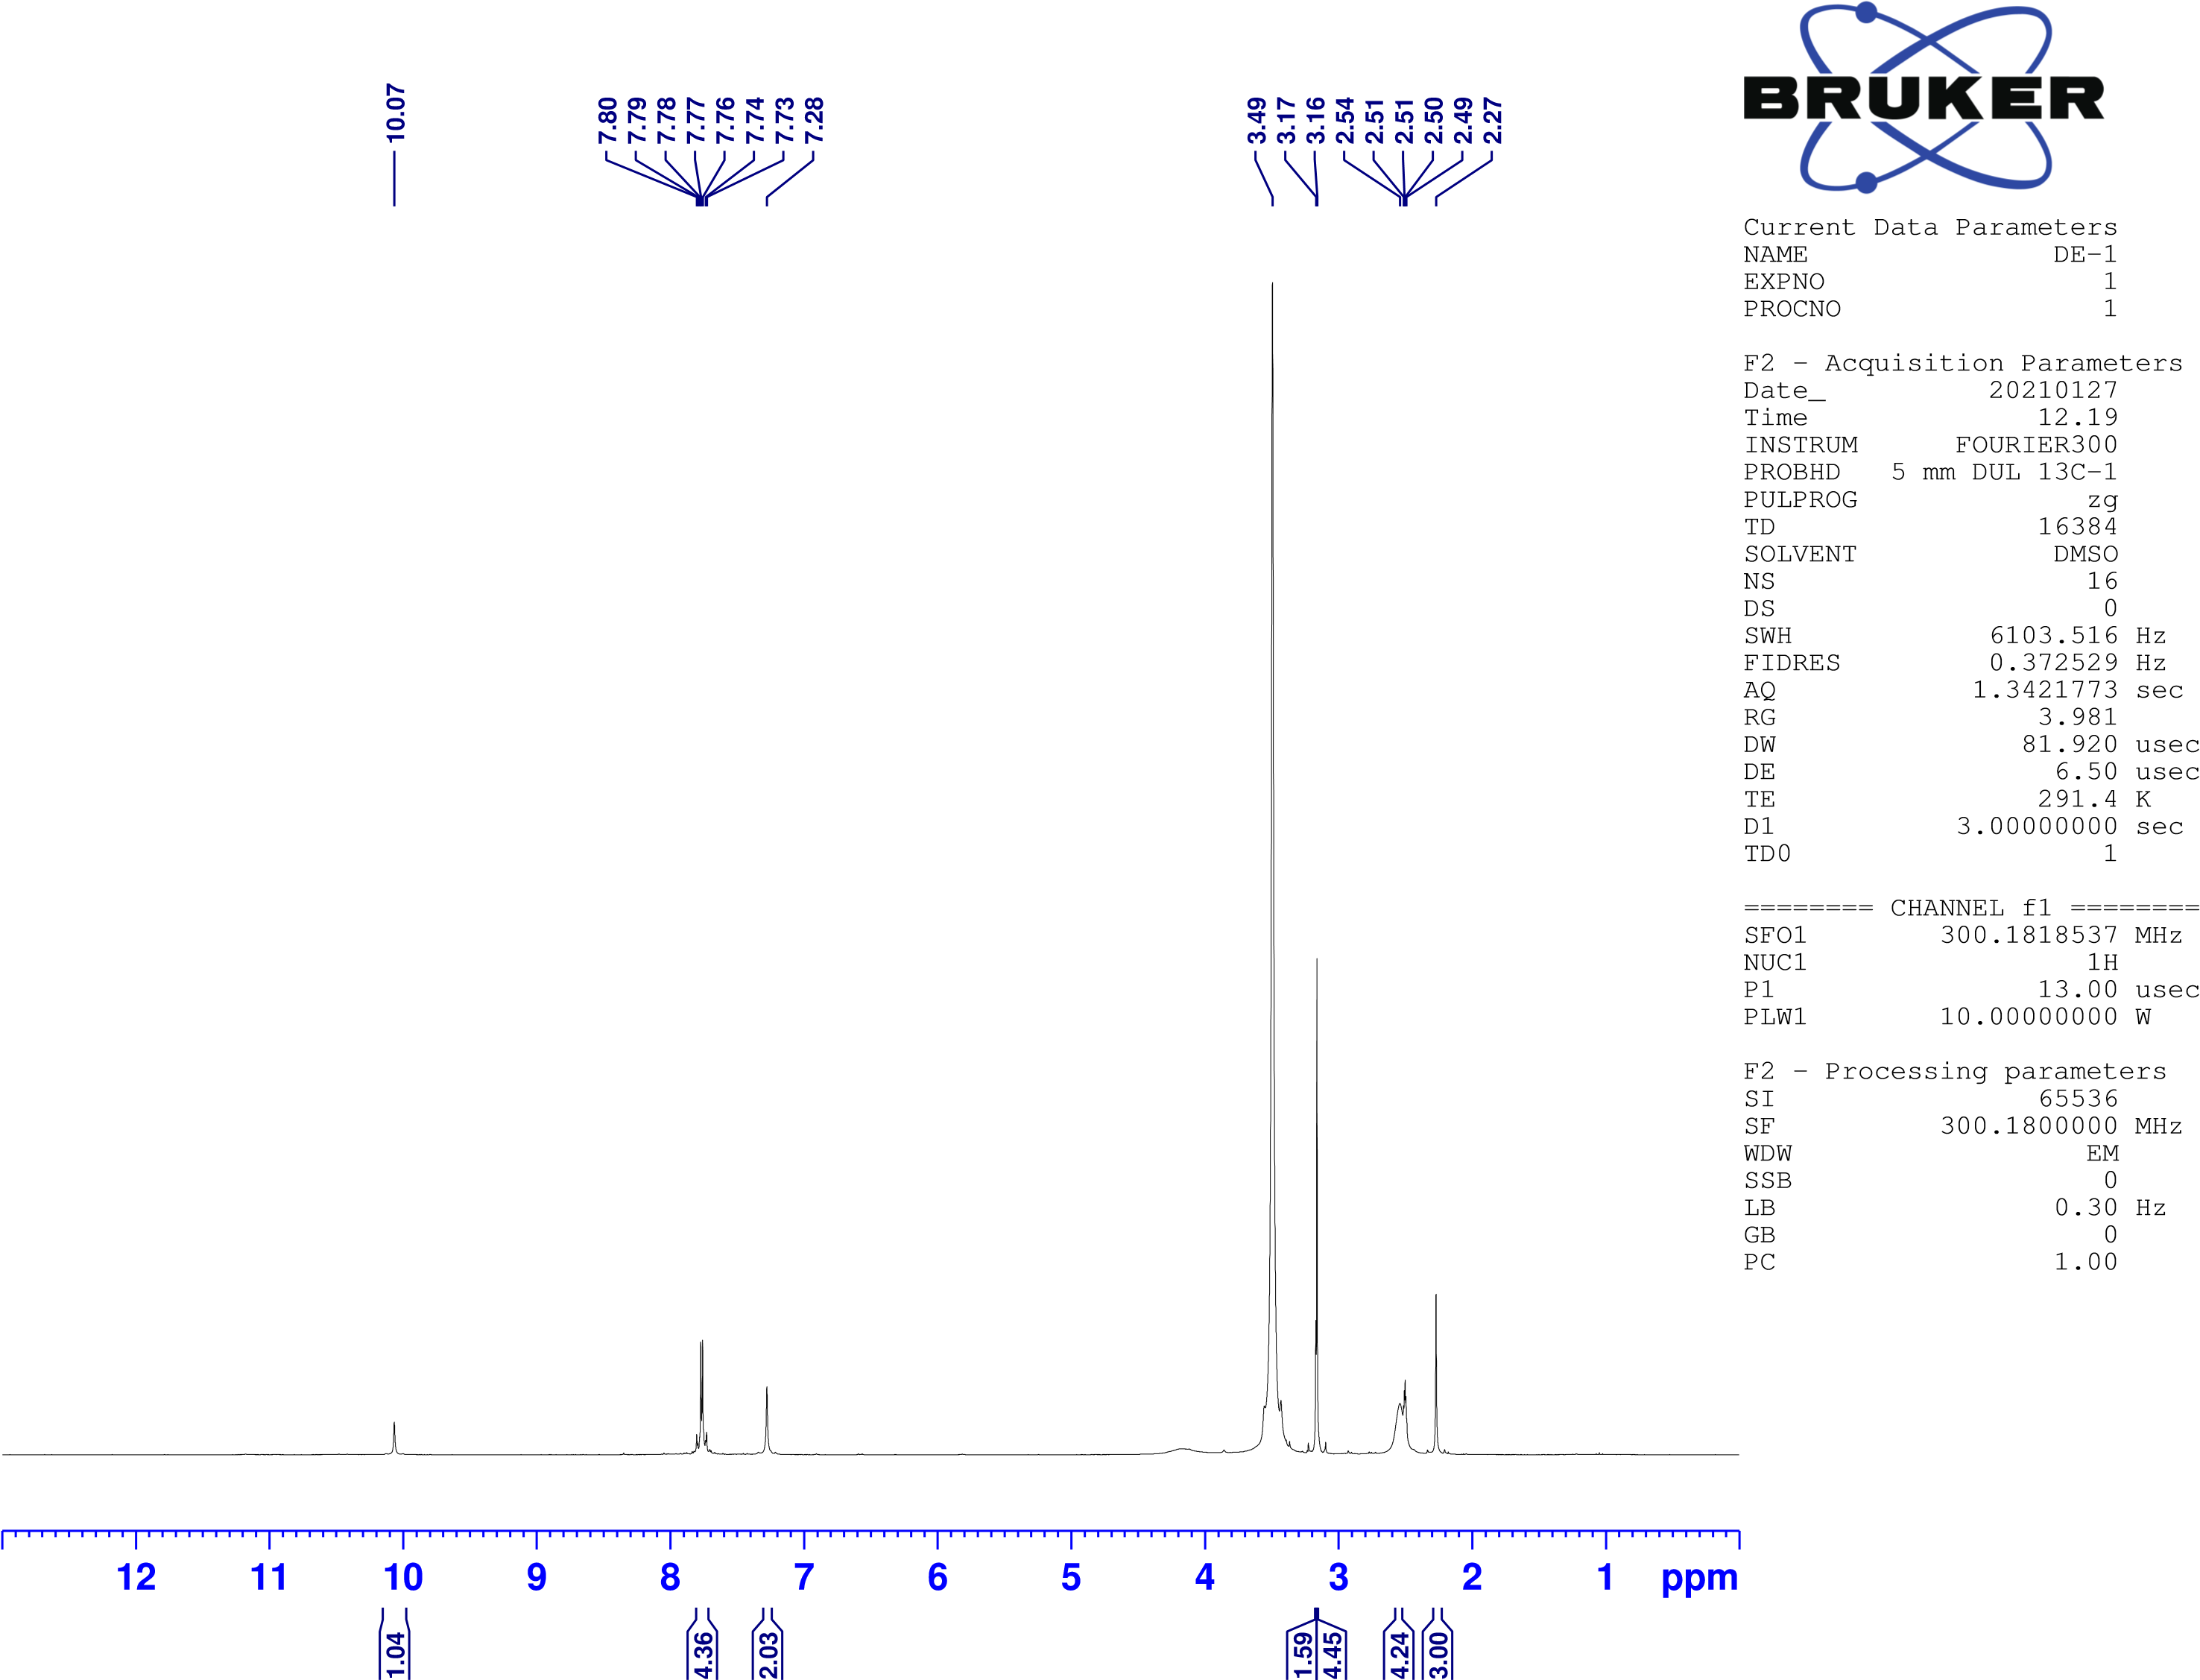


**Figure S1.** Compound **2a** 1H-NMR spectrum

**Figure S2.** Compound **2a** 13C-NMR spectrum


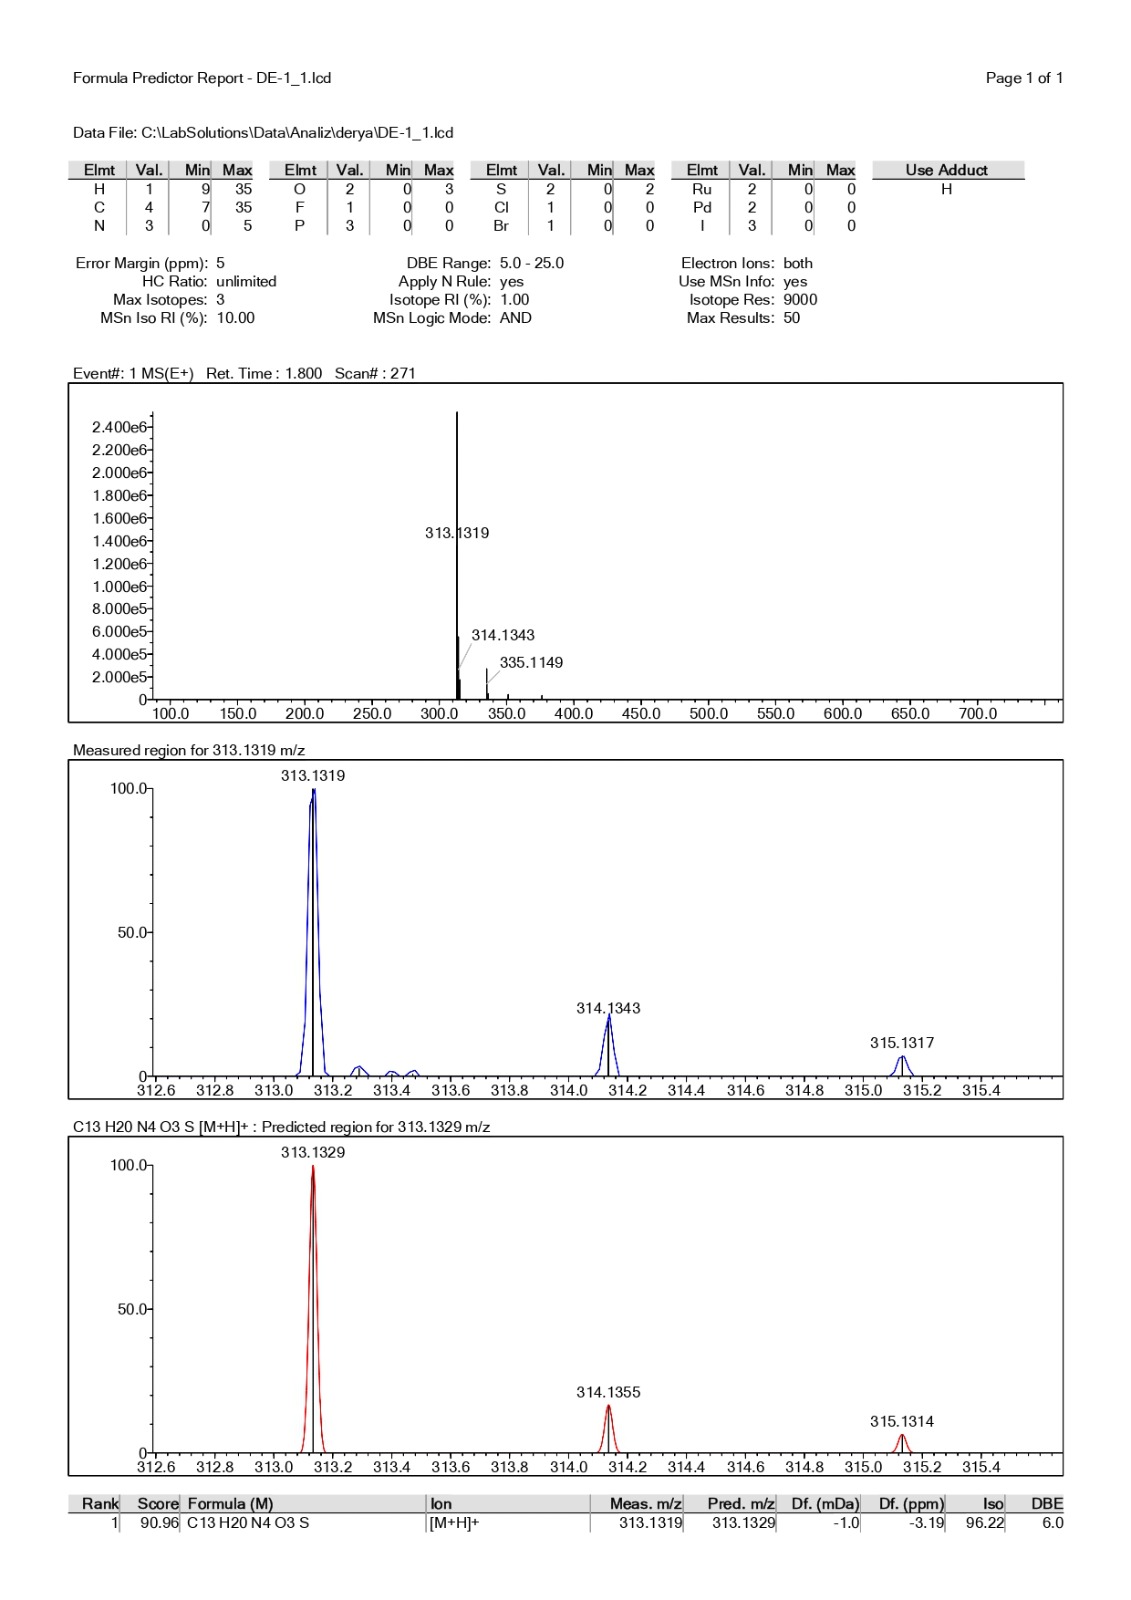


**Figure S3.** Compound **2a** HRMS report


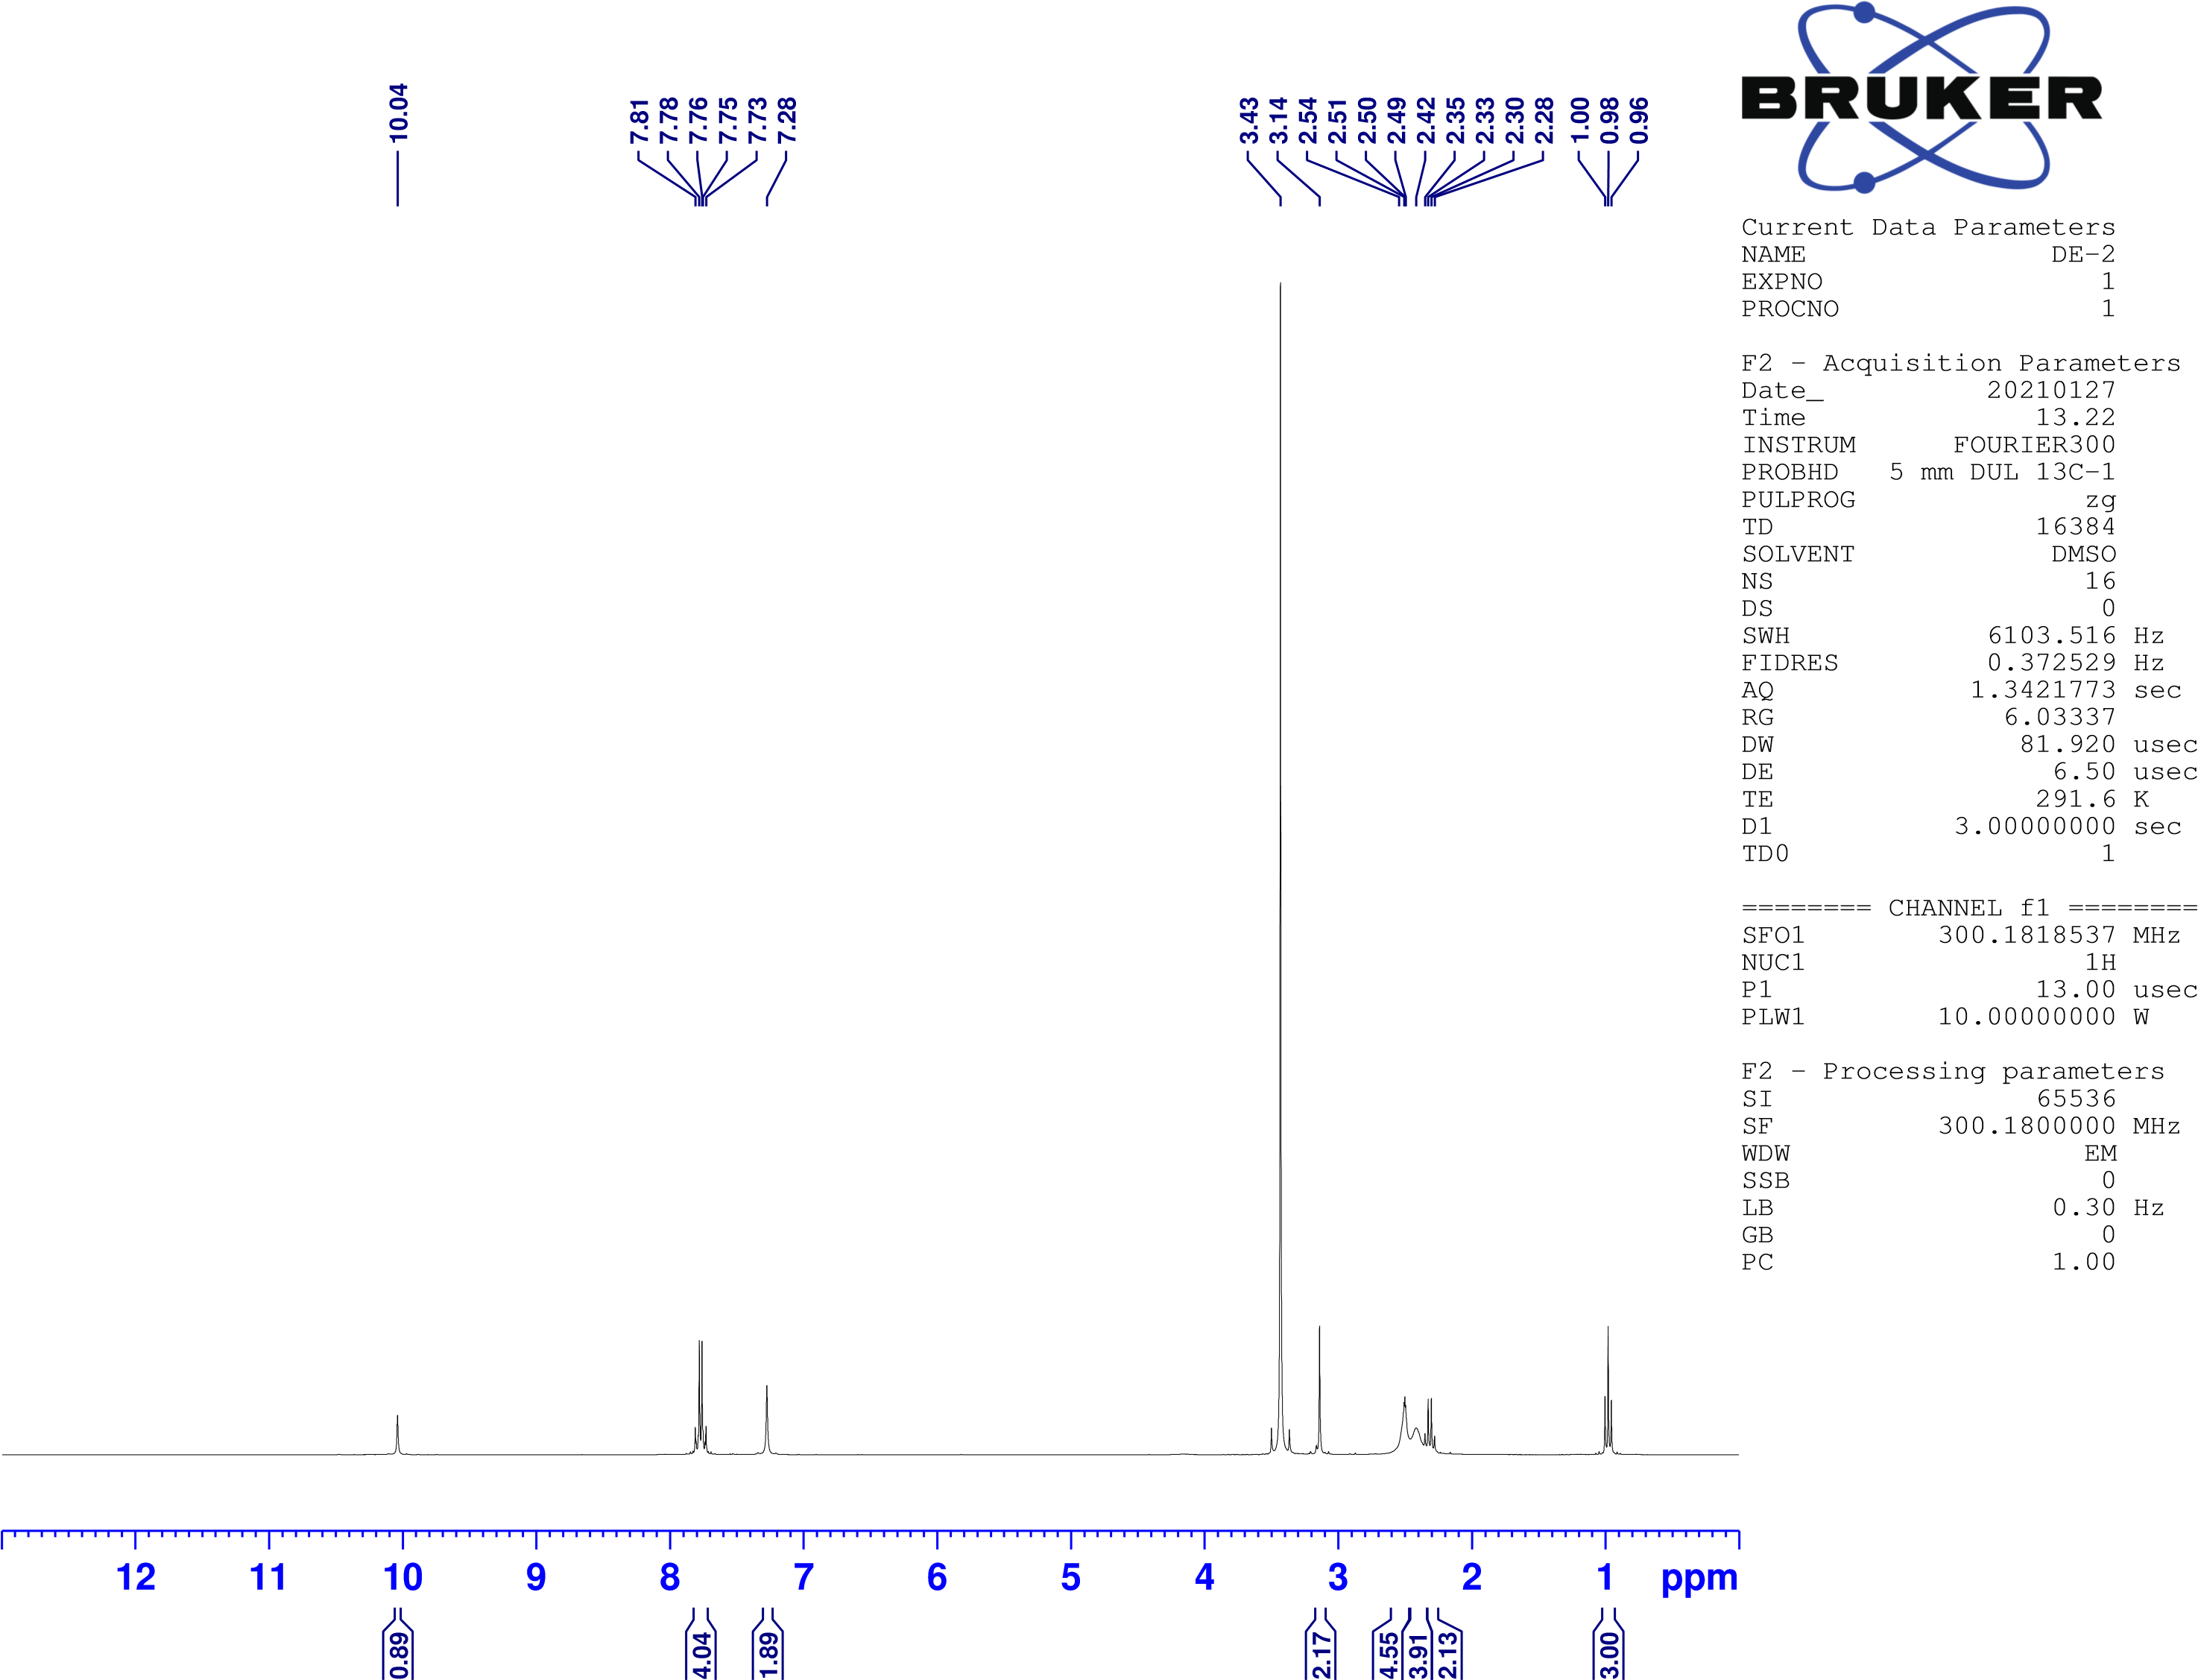


**Figure S4.** Compound **2b** 1H-NMR spectrum

**Figure S5.** Compound **2b** 13C-NMR spectrum


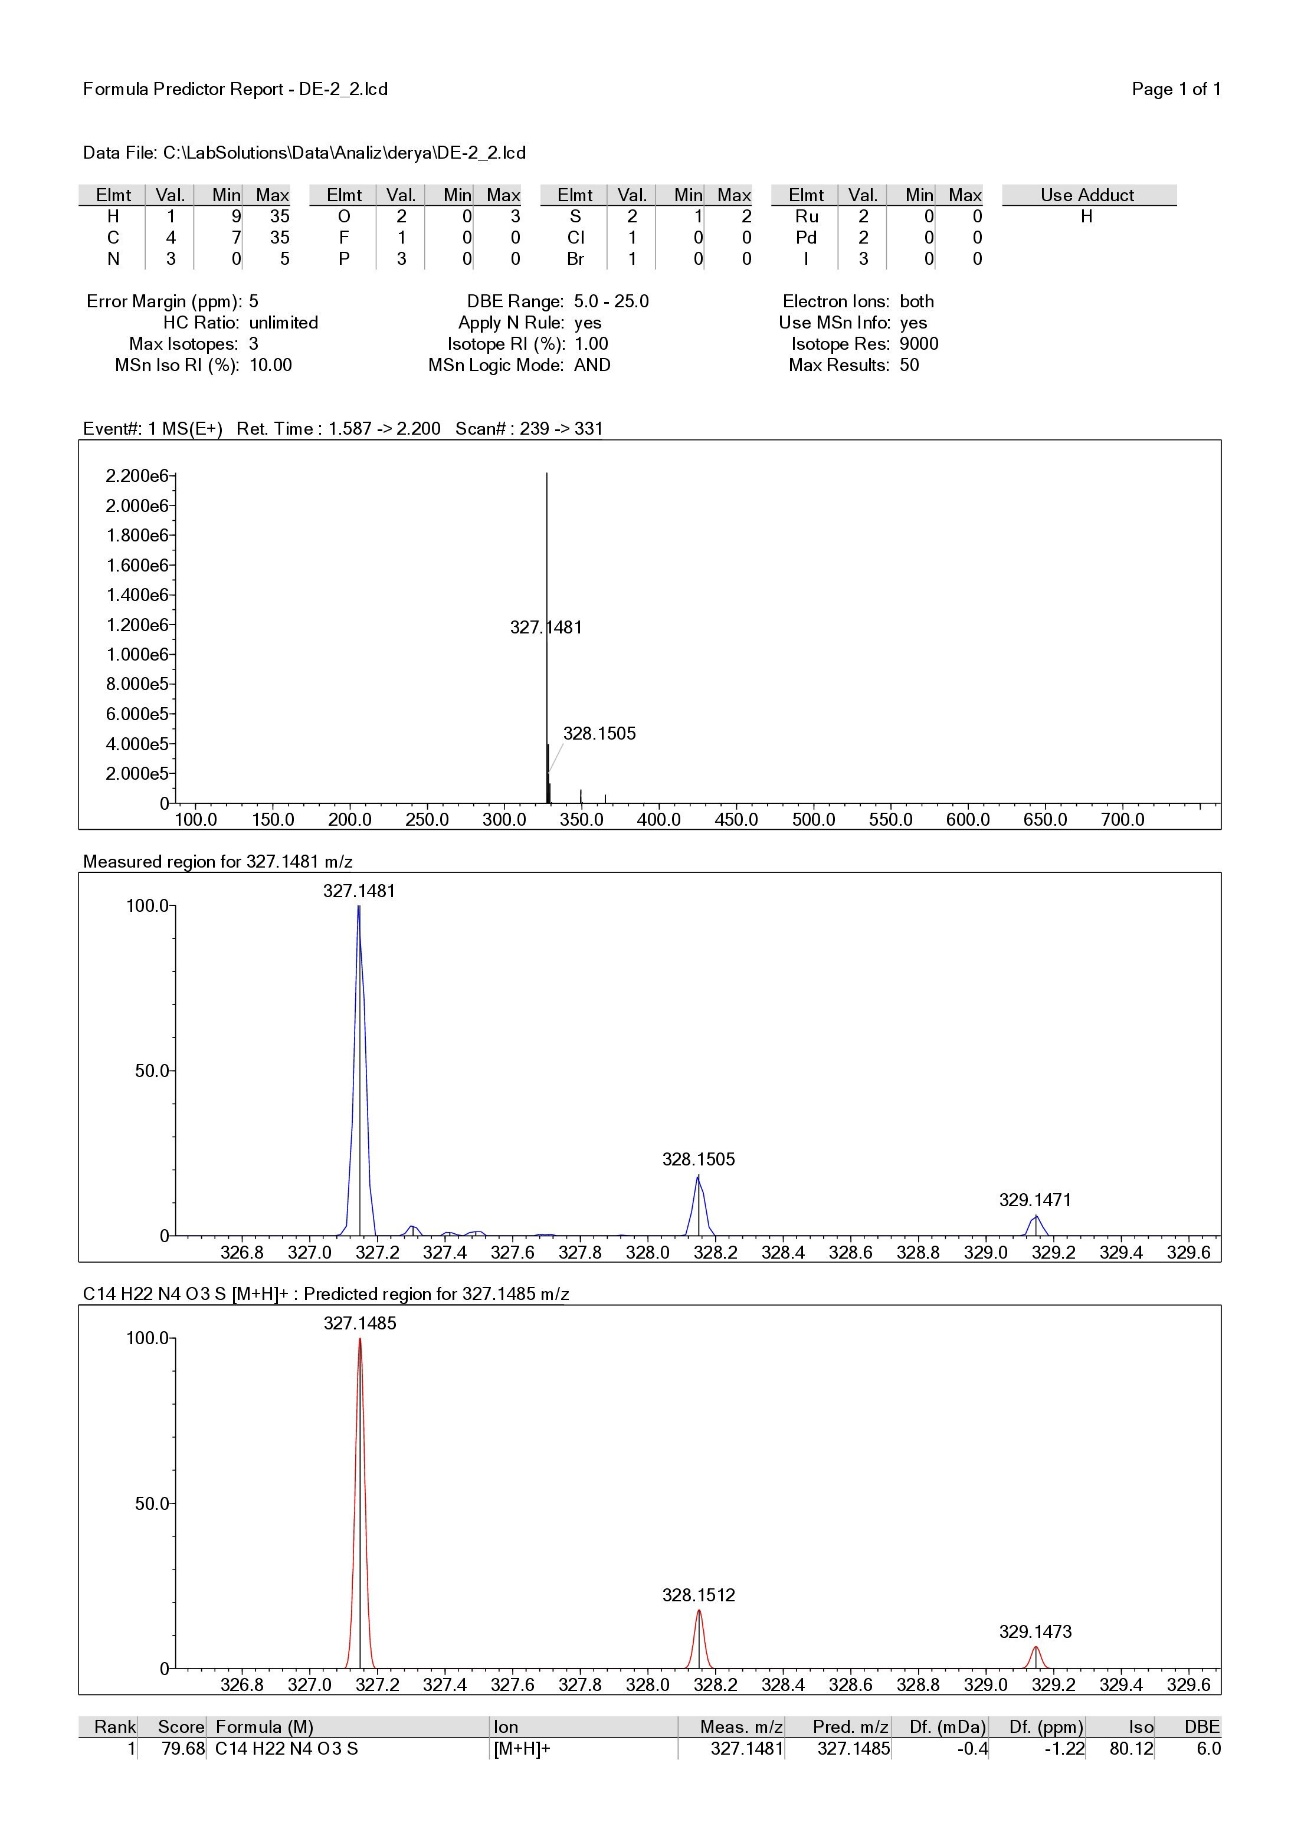


**Figure S6.** Compound **2b** HRMS report


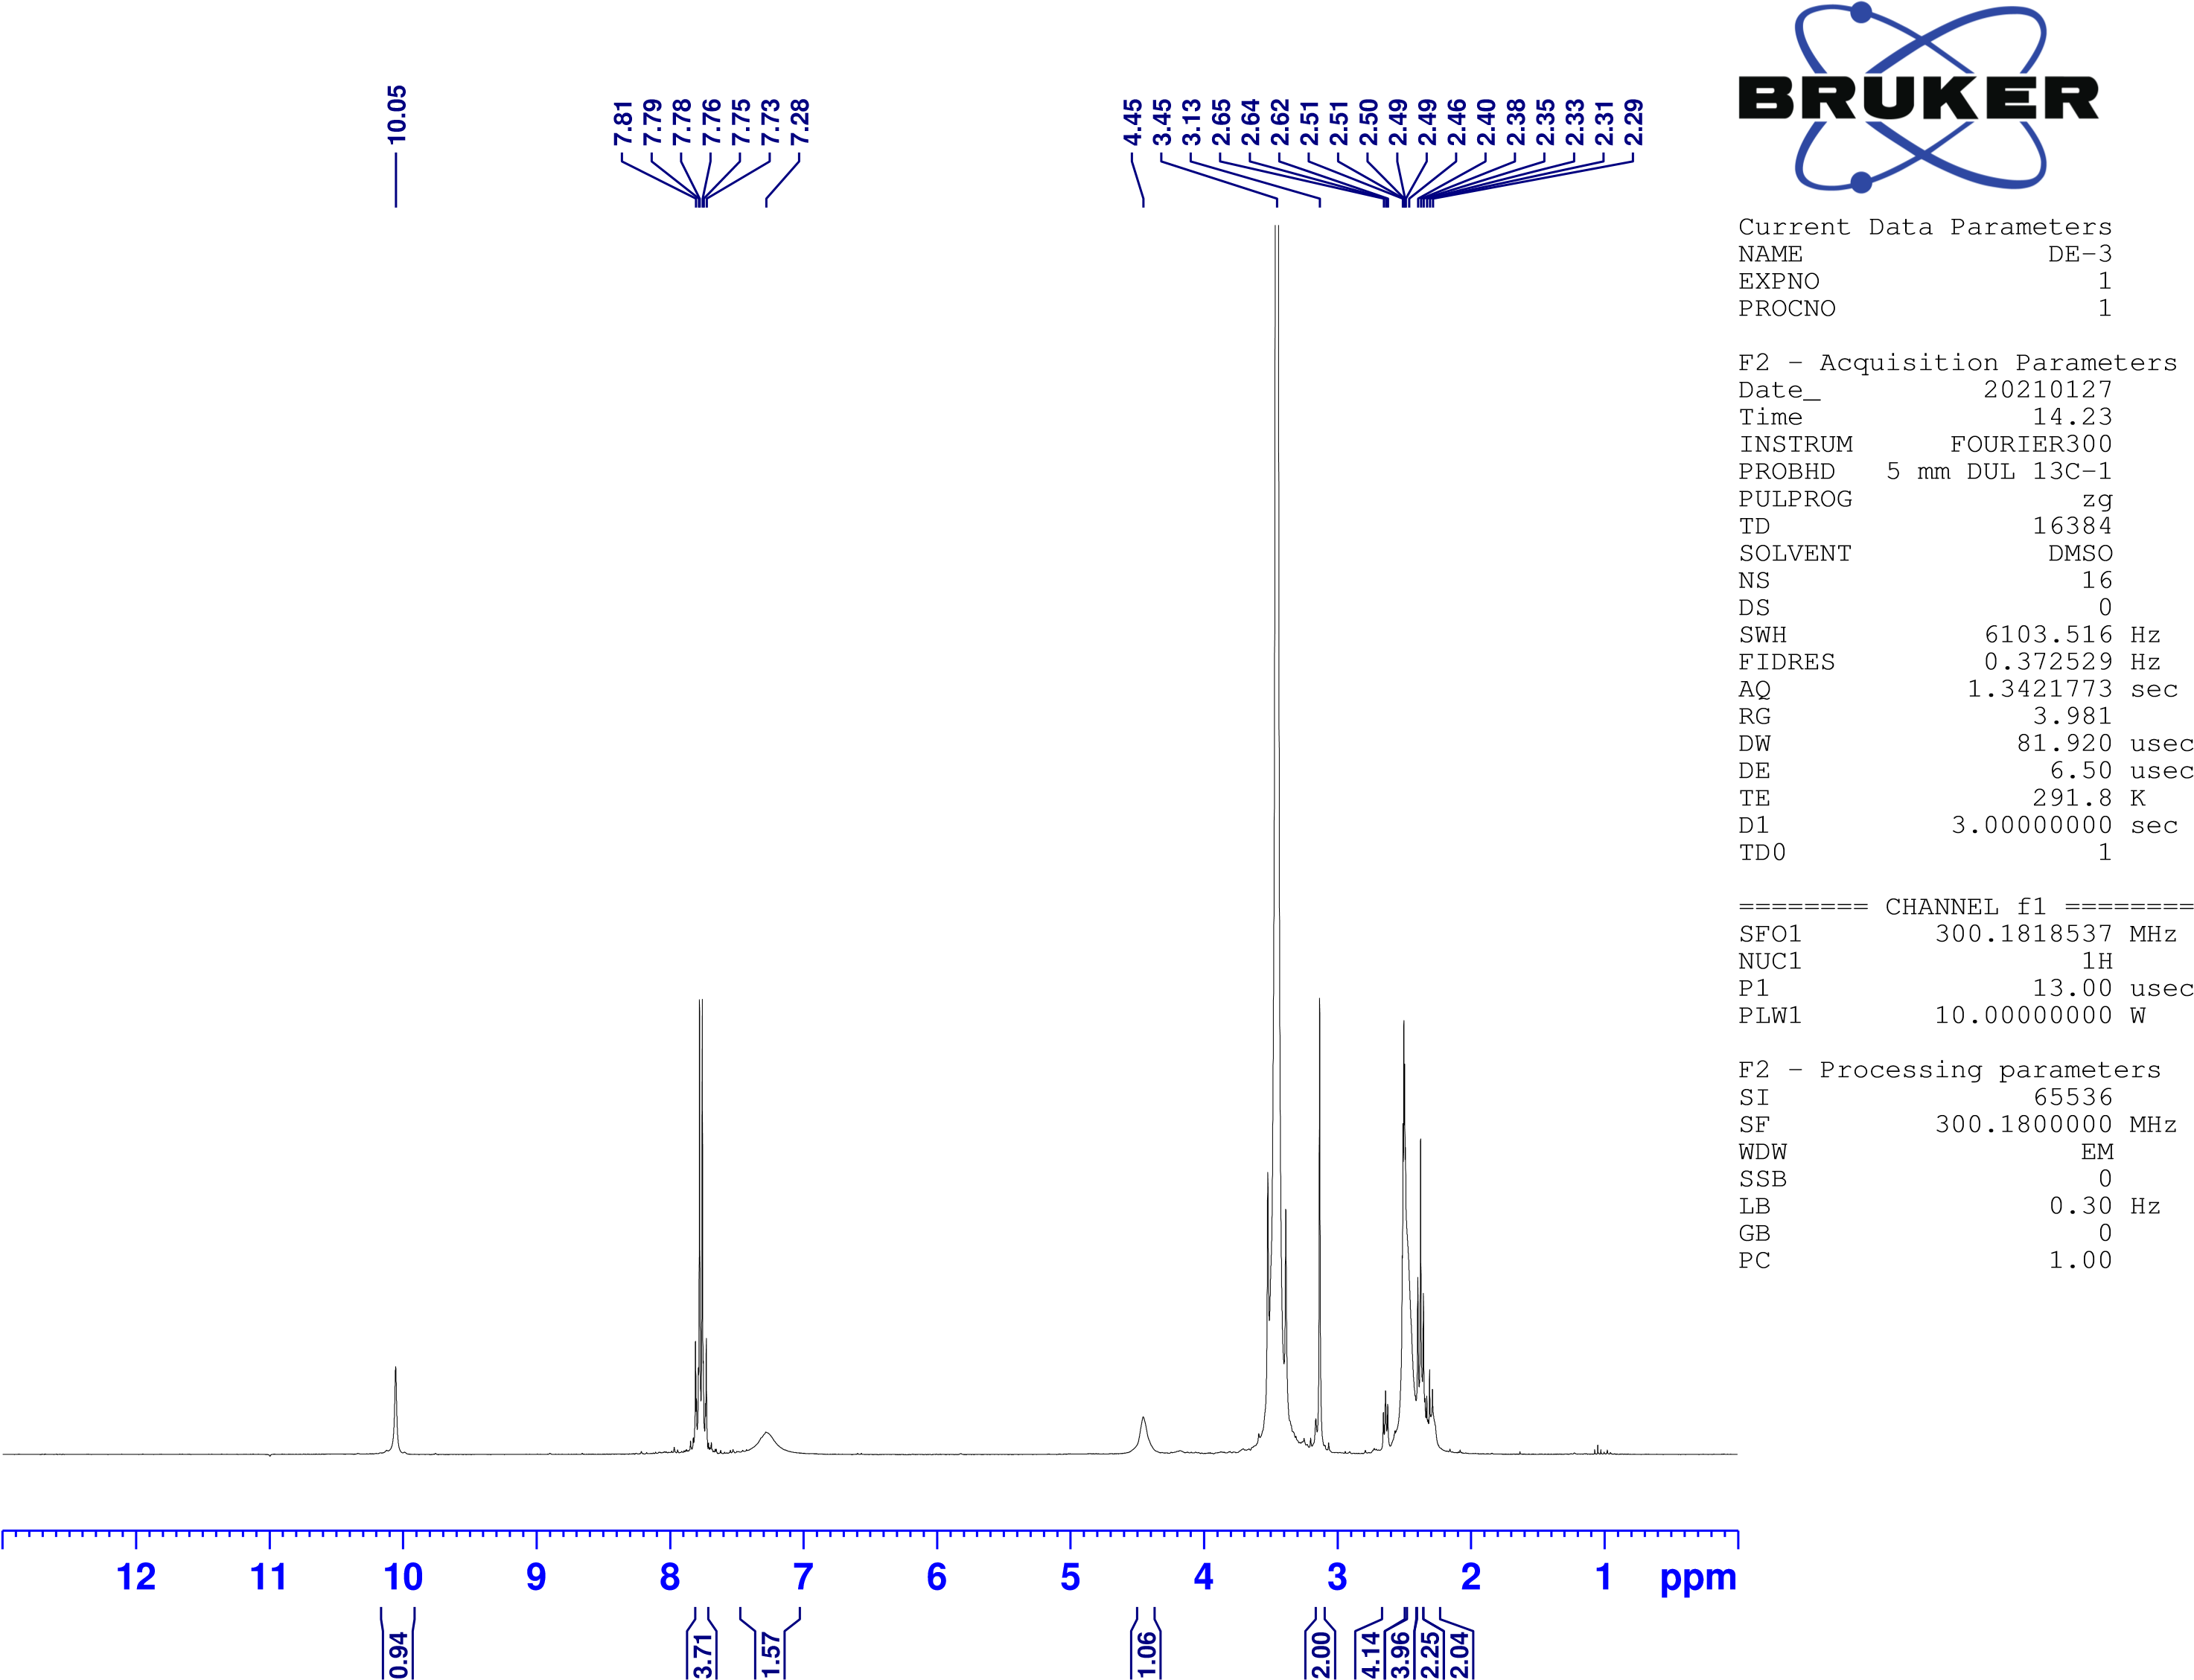


**Figure S7.** Compound **2c** 1H-NMR spectrum

**Figure S8.** Compound **2c** 13C-NMR spectrum


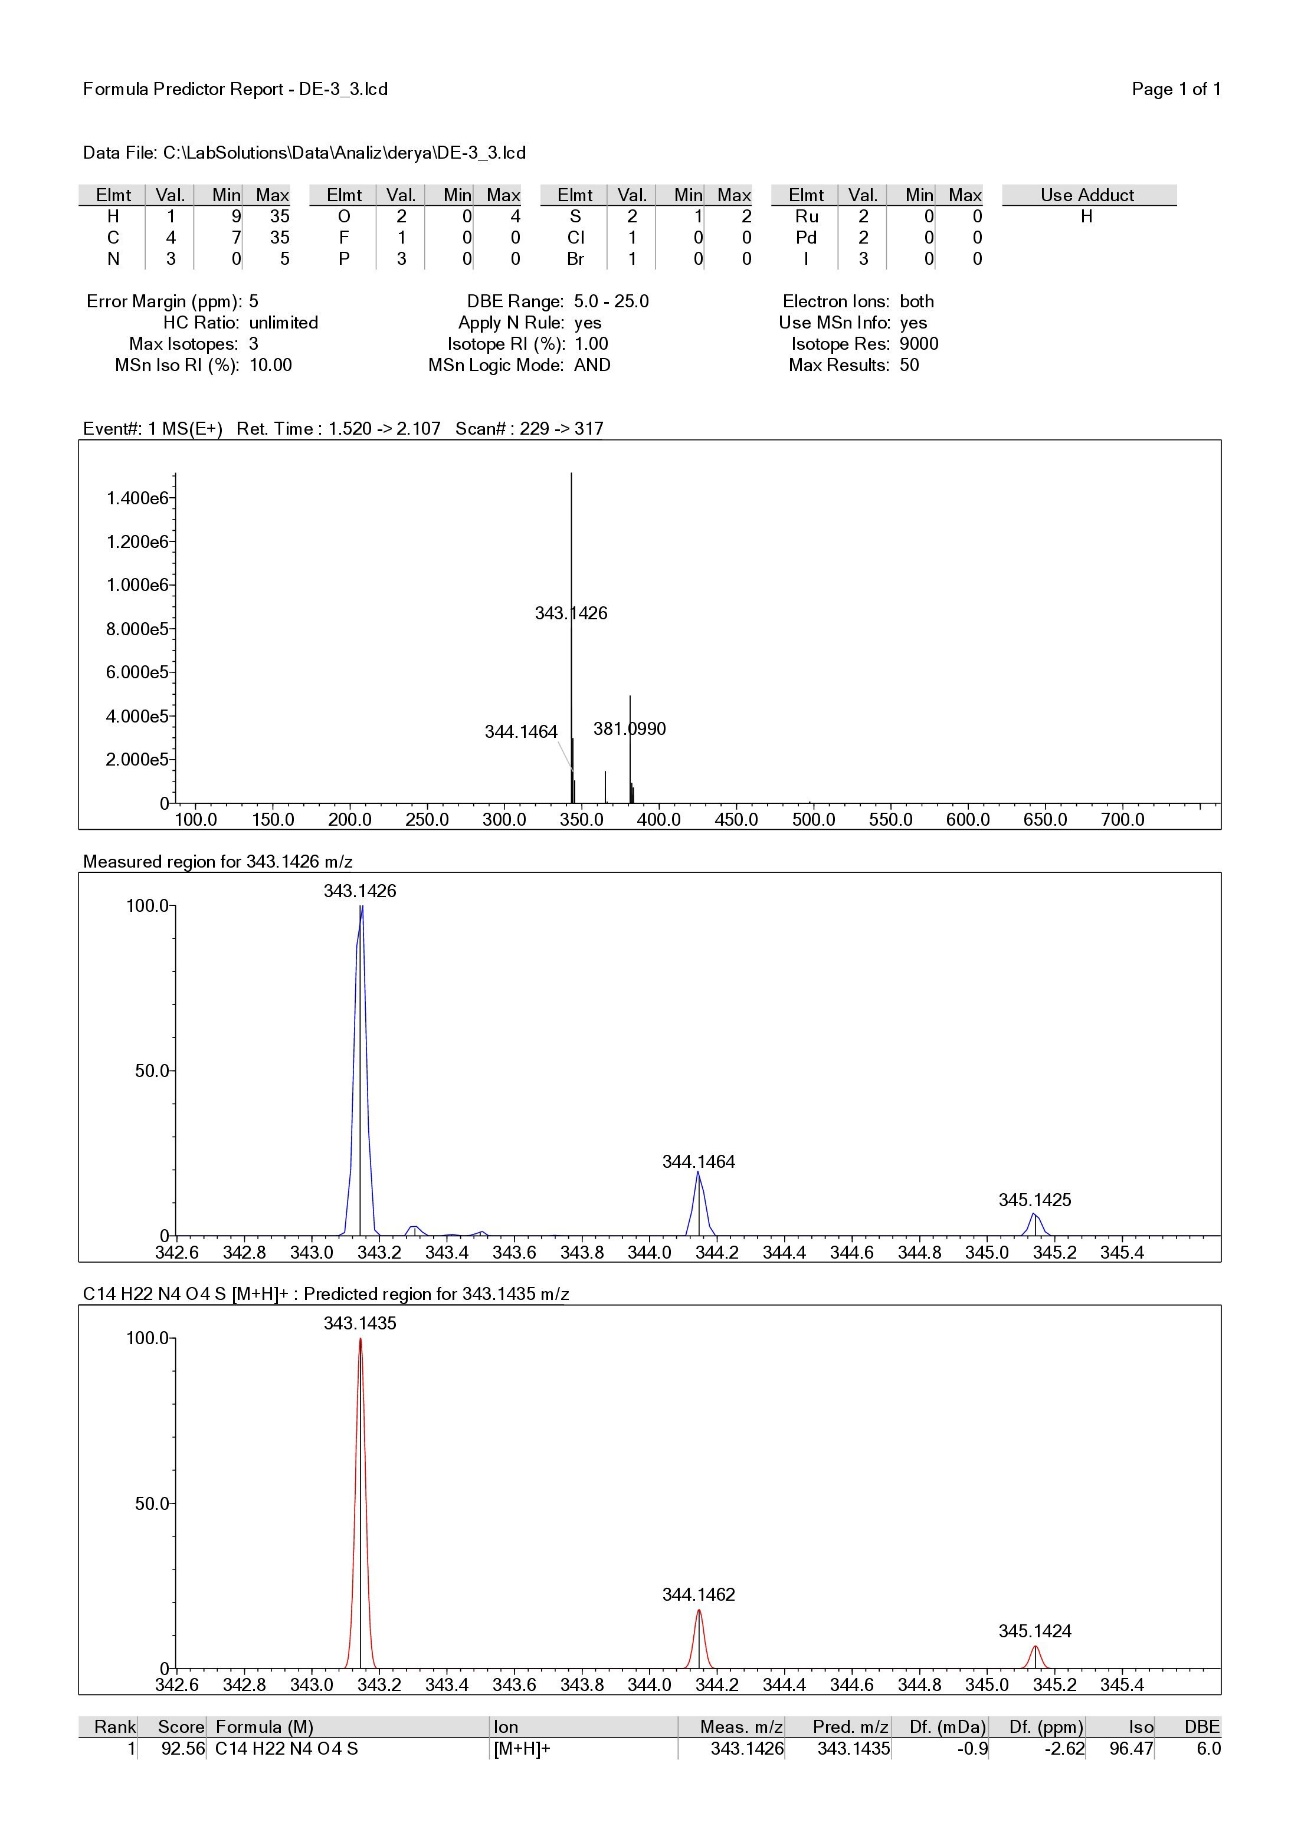


**Figure S9.** Compound **2c** HRMS report

**Figure S10.** Compound **2d** 1H-NMR spectrum

**Figure S11.** Compound **2d** 13C-NMR spectrum


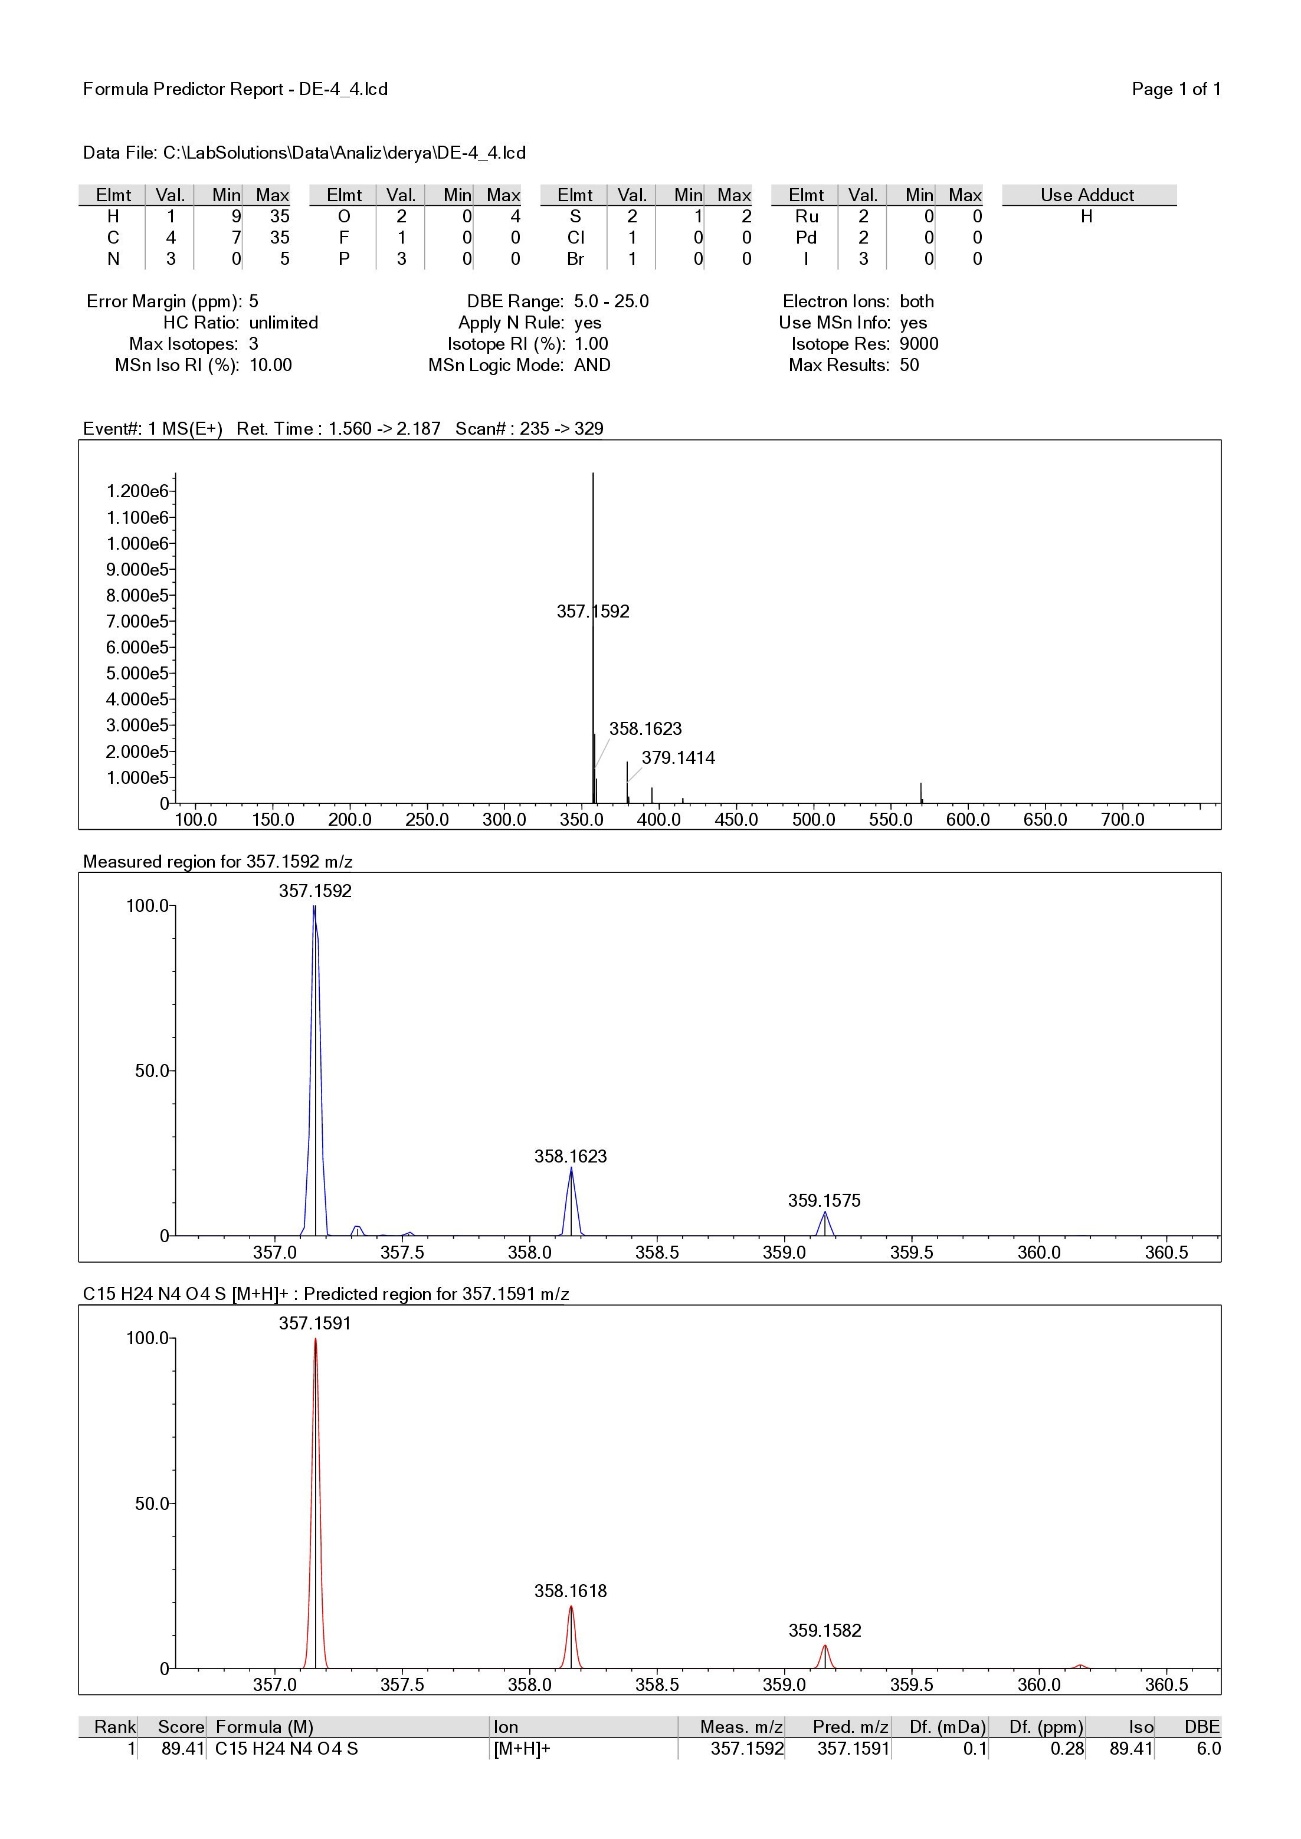


**Figure S12.** Compound **2d** HRMS report

**Figure S13.** Compound **2e** 1H-NMR spectrum

**Figure S14.** Compound **2e** 13C-NMR spectrum


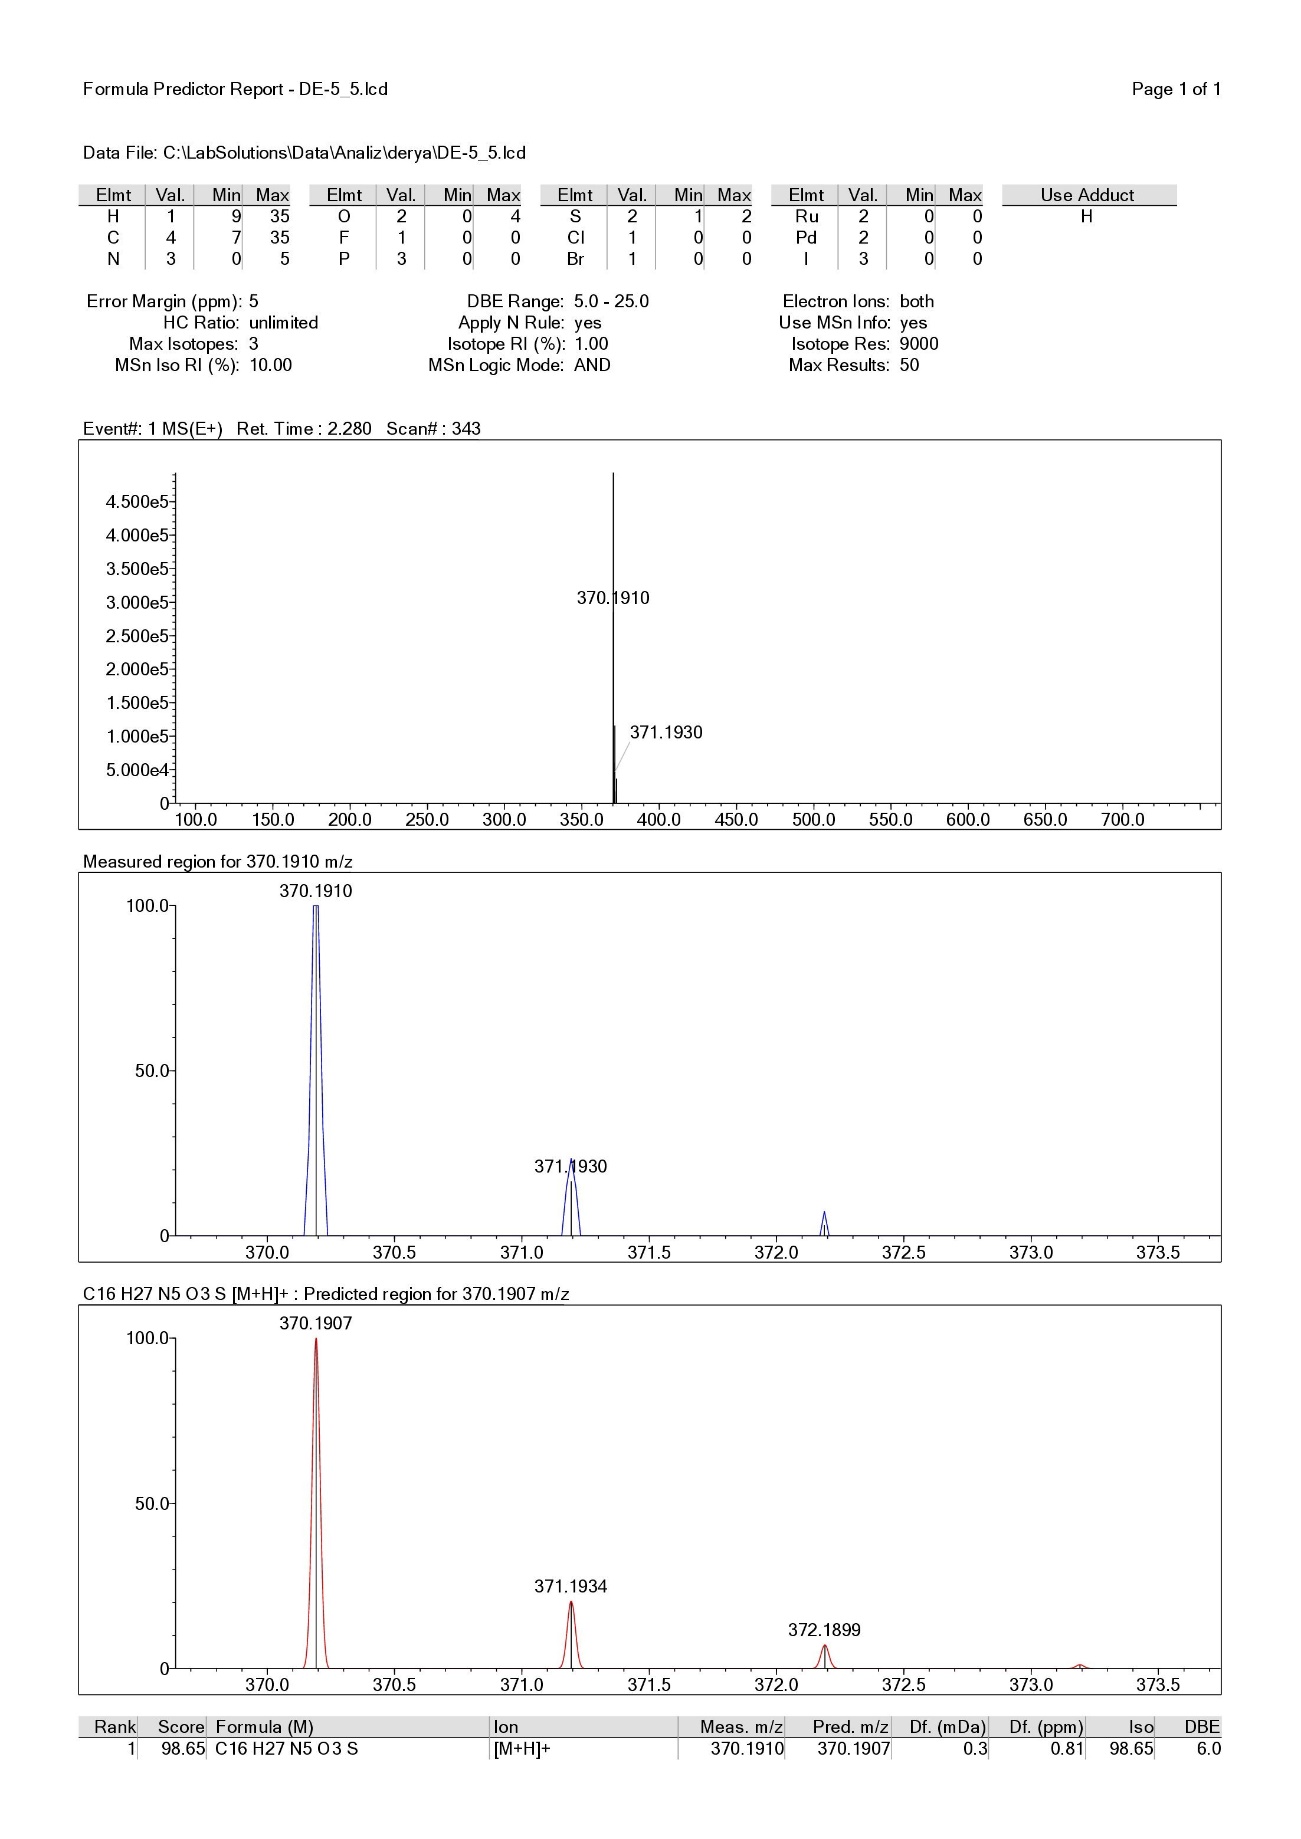


**Figure S15.** Compound **2e** HRMS report

**Figure S16.** Compound **2f** 1H-NMR spectrum

**Figure S17.** Compound **2f** 13C-NMR spectrum

**Figure S18.** Compound **2g** 1H-NMR spectrum

**Figure S19.** Compound **2g** 13C-NMR spectrum


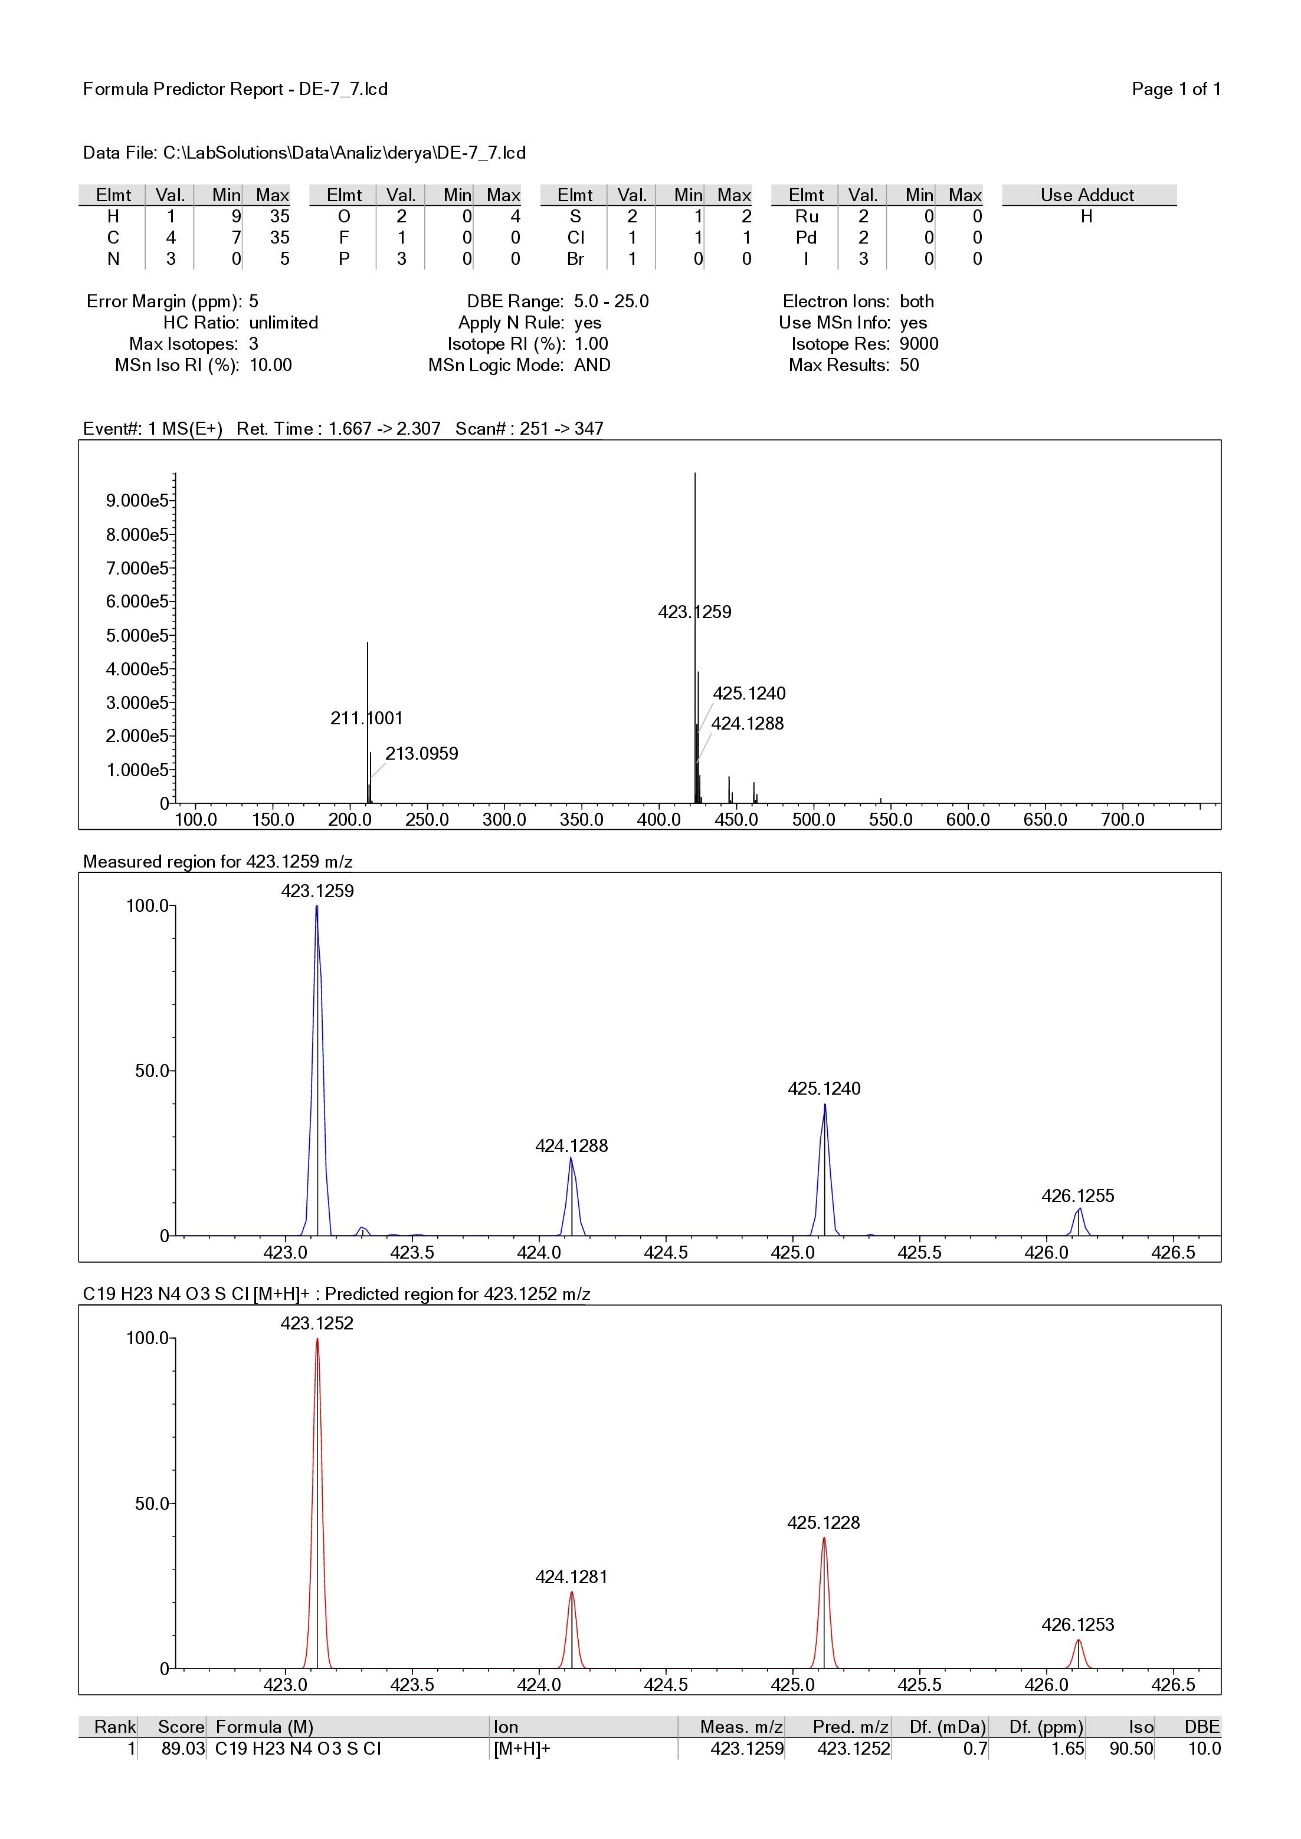


**Figure S20.** Compound **2g** HRMS report

**Figure S21.** Compound **2h** 1H-NMR spectrum

**Figure S22.** Compound **2h** 13C-NMR spectrum


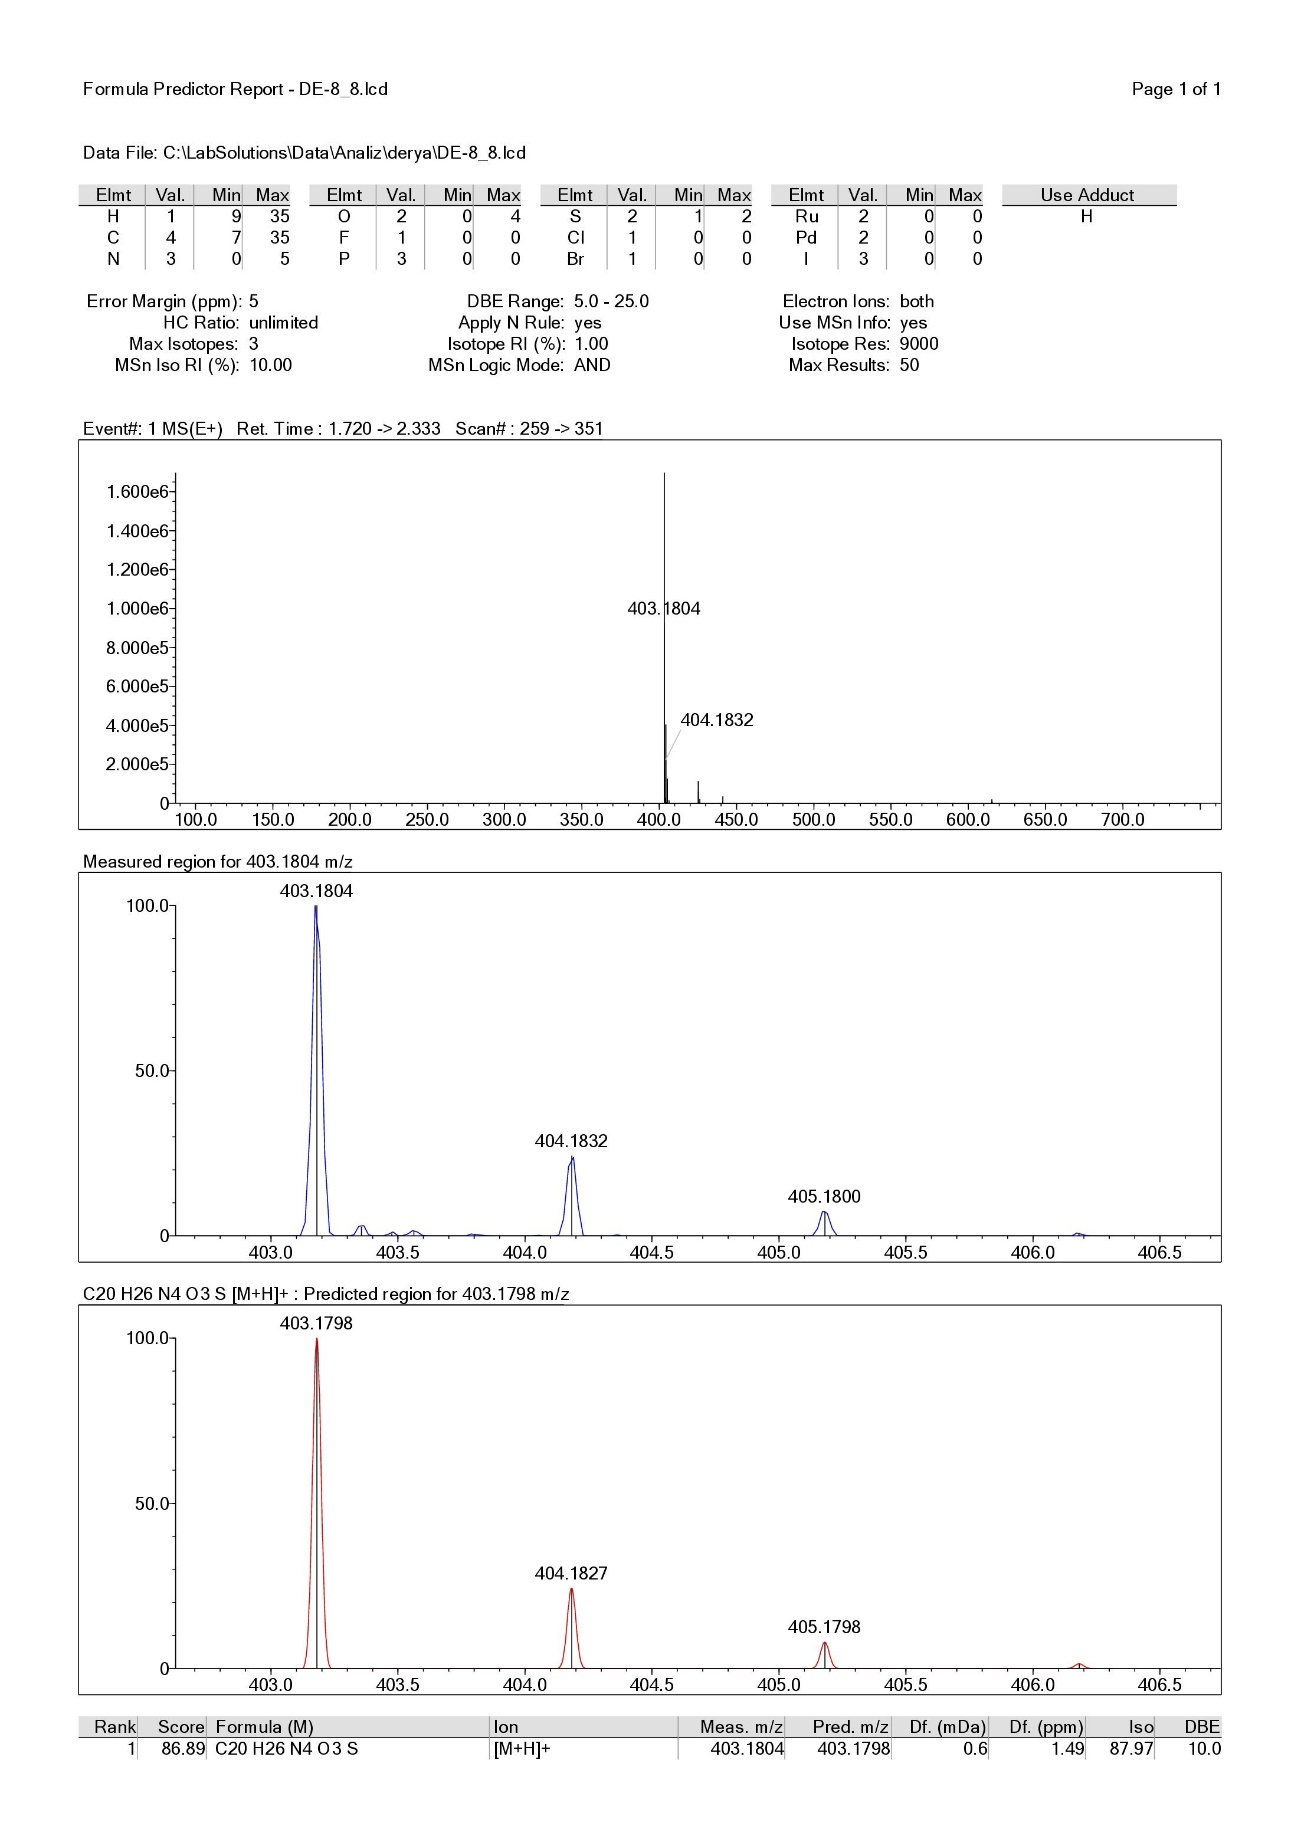


**Figure S23.** Compound **2h** HRMS report

**Figure S24.** Compound **2i** 1H-NMR spectrum

**Figure S25.** Compound **2i** 13C-NMR spectrum


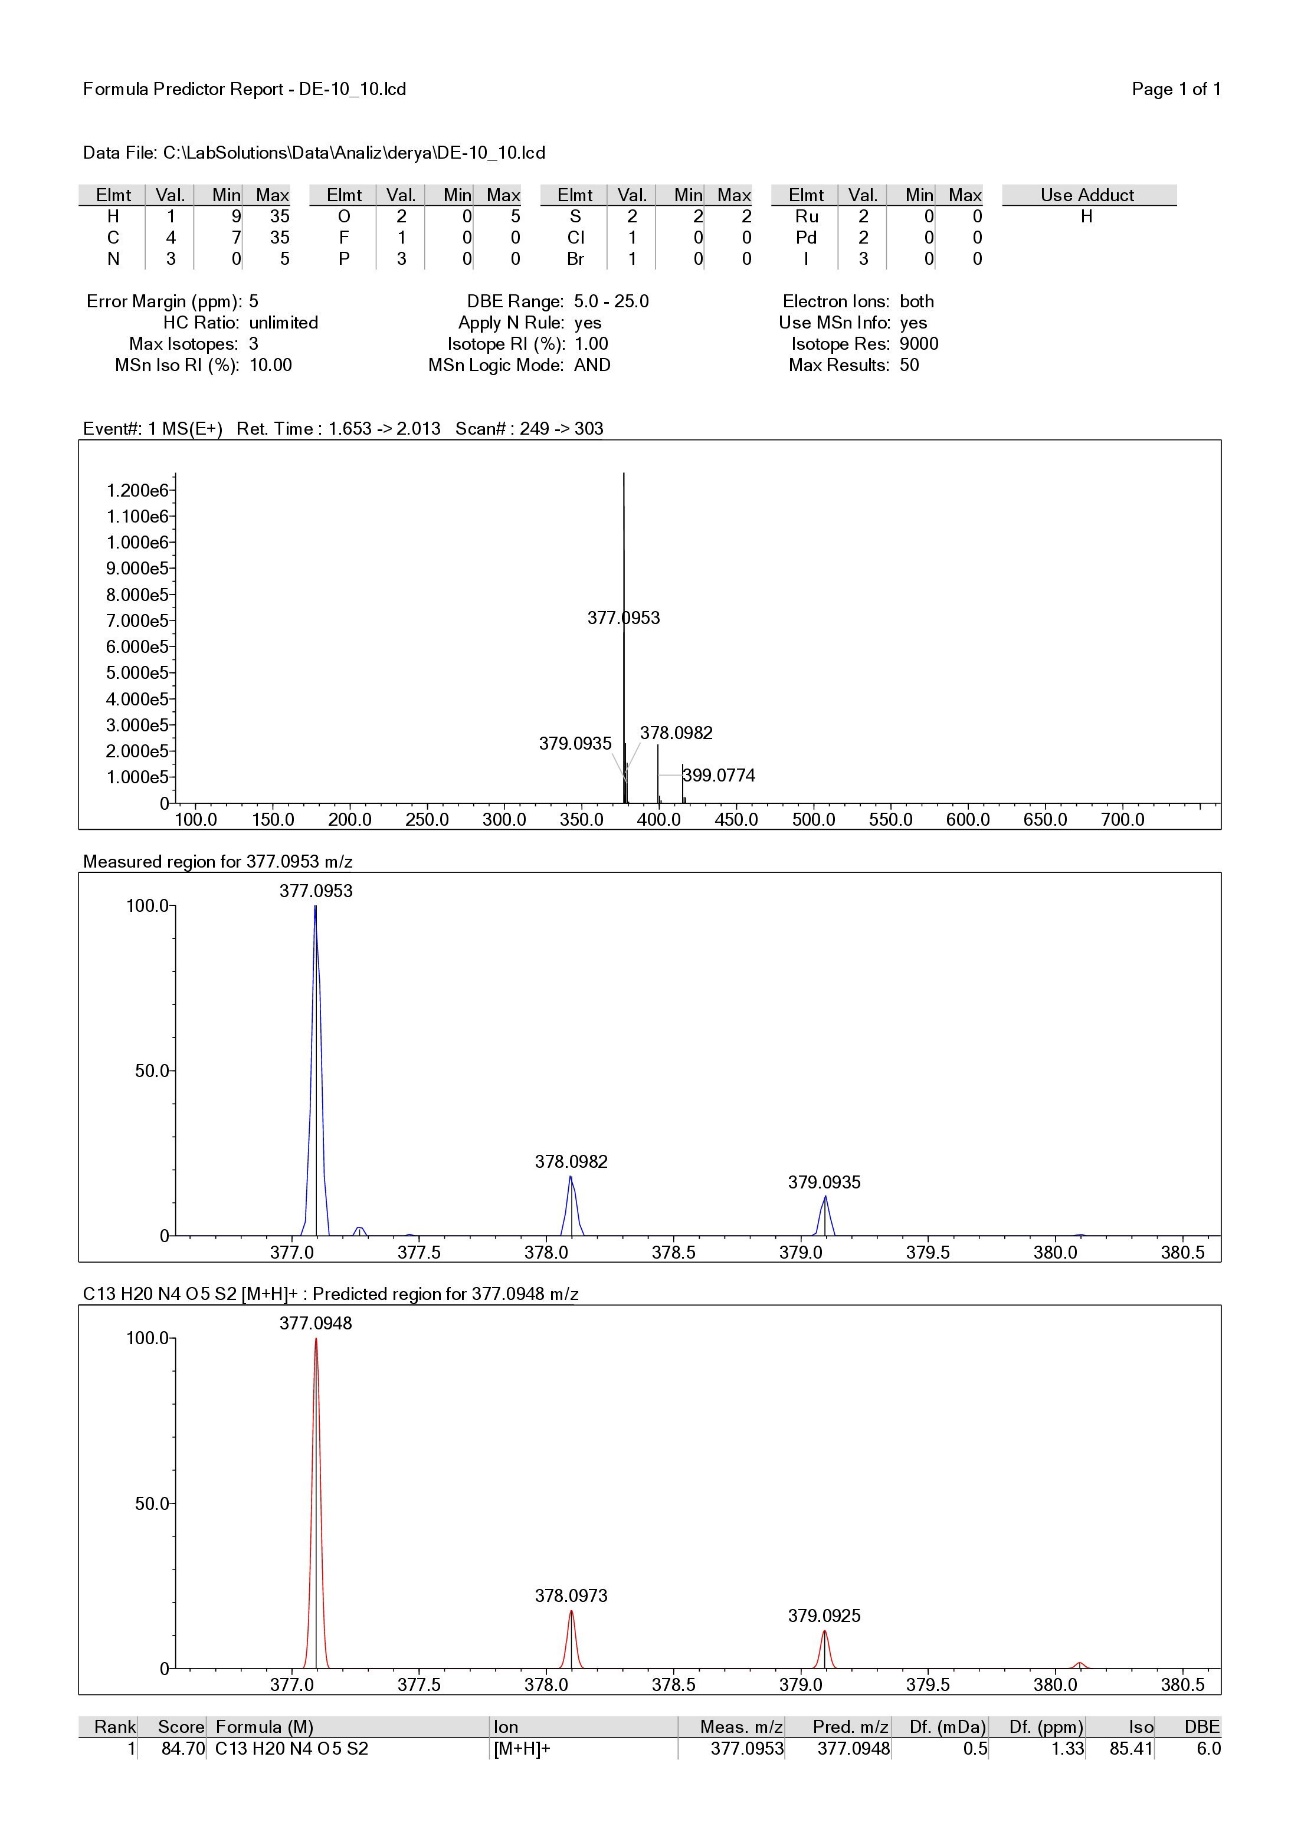


**Figure S26.** Compound **2i** HRMS report

**Figure S27.** Compound **2j** 1H-NMR spectrum

**Figure S28.** Compound **2j** 13C-NMR spectrum


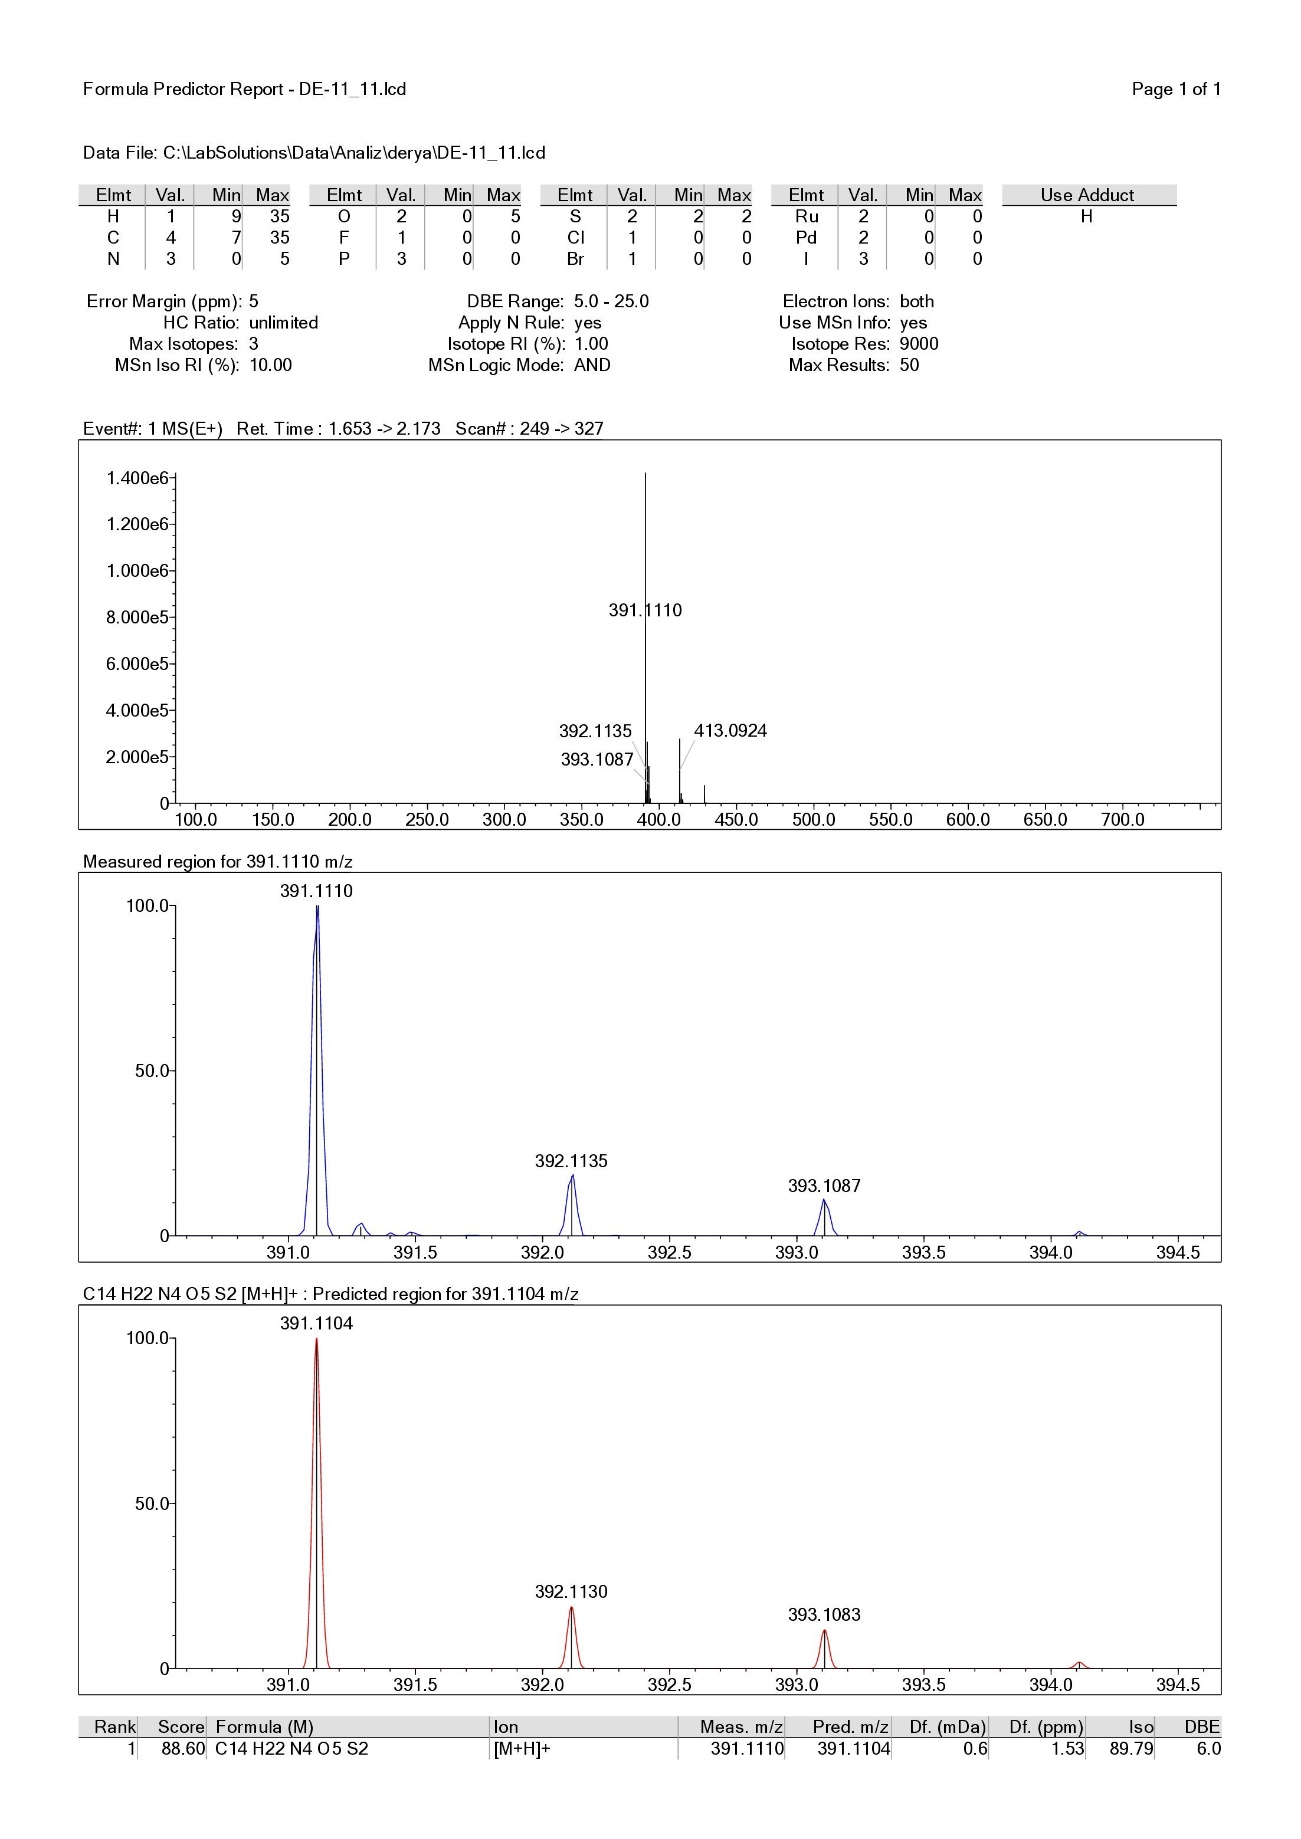


**Figure S29.** Compound **2j** HRMS report
